# Supplementary material for: Adolescents’ Social Goal Orientations
Source: Atypon-hosted journal article supplement (doi:10.1026/0049-8637/a000277), 2023-06-27
Supplement: 0049-8637_a000277_esm1.pdf [file 0049-8637_a000277_esm1.pdf]

**Electronic Supplementary Material (ESM 1)**

**Adolescents' Social Goal Orientations:  
Associations with Parenting Styles and Behavioral Outcomes**

*Zeitschrift für Entwicklungspsychologie und Pädagogische Psychologie*

Naska Goagoses & Neele Bäker

**Table E1**

Detailed Demographic Description of Participants.

| <b>Adolescents</b><br>(n = 354)                                                                                                    | <b>Parents</b><br>(n = 121)                                                                                                                                                                                                               |
|------------------------------------------------------------------------------------------------------------------------------------|-------------------------------------------------------------------------------------------------------------------------------------------------------------------------------------------------------------------------------------------|
| <u>Gender</u><br>43.5% Male<br>56.5% Female                                                                                        | <u>Questionnaire Completed by</u><br>76.9% Mothers<br>23.1% Fathers                                                                                                                                                                       |
| <u>Age</u><br>M = 14.11<br>SD = 1.79                                                                                               | <u>Country of Birth</u><br>61.2% Germany - both parents<br>36.4% Other - one or both parents (e.g., Russia, Turkey)<br>n <sub>missing</sub> = 3                                                                                           |
| <u>Country of Birth</u><br>91.5% Germany<br>7.6% Other (e.g., Poland, Syria)<br>n <sub>missing</sub> = 3                           | <u>If Other - Number of Years Living in Germany</u><br>M = 22.86 years<br>Range: 1 year – 50 years<br>(Based on the responses of 42 parents)                                                                                              |
| <u>Language Spoken at Home</u><br>84.5% German<br>15.3% Other<br>n <sub>missing</sub> = 1                                          | <u>Language Spoken Most Often</u><br>81.0% German<br>17.4% Other<br>n <sub>missing</sub> = 2                                                                                                                                              |
| <u>School Type</u><br>1.1% Hauptschule<br>47.2% Realschule<br>35.6% Gymnasium<br>15.5% Oberschule<br>0.3% Gesamtschule<br>0.3% IGS | <u>Highest Level of School Completion Father</u><br>5.8% No school completion<br>24.0% Hauptschulabschluss (9 years)<br>37.2% Realschulabschluss (10 years)<br>31.4% Fachhochschul/Hochschulreife (12+ years)<br>n <sub>missing</sub> = 2 |
|                                                                                                                                    | <u>Highest Level of School Completion Mother</u><br>4.1% No school completion<br>12.4% Hauptschulabschluss (9 years)<br>47.1% Realschulabschluss (10 years)<br>34.7% Fachhochschul/Hochschulreife (12+ years)<br>n <sub>missing</sub> = 2 |

*Note.* Gender was assessed in German by asking participants to indicate Geschlecht: männlich oder weiblich; n<sub>missing</sub> indicates the number of participants who did not respond to the question.

**Table E2**

Cronbach's Alpha and McDonald's Omega Coefficients for IGI-C Sub-Scales.

| <b>Sub-Scale</b>    | <b>Number of Items</b> | <b><math>\alpha</math></b> | <b><math>\omega</math></b> |
|---------------------|------------------------|----------------------------|----------------------------|
| Agentic             | 3                      | .62                        | .62                        |
| Agentic-Separate    | 3                      | .70                        | .70                        |
| Separate            | 6                      | .75                        | .76                        |
| Submissive-Separate | 4                      | .82                        | .83                        |
| Submissive          | 4                      | .72                        | .76                        |
| Submissive-Communal | 5                      | .58                        | .61                        |
| Communal            | 4                      | .73                        | .74                        |
| Agentic-Communal    | 4                      | .54                        | .55                        |

*Note.* Alpha values are in a similar range as reported by previous studies, e.g., .60 - .80 (Findley & Ojanen, 2013), .61 - .78 (Findley-Van Nostrand & Ojanen, 2018), .57 - .72 (Ojanen et al., 2005), and .58 - .79 (Ojanen et al., 2013).

**Table E3**

Mean Differences for Females and Males of Assessed Variables.

| Variable               | Females  |           | Males    |           | <i>t</i> (352) | <i>p</i> | Cohen's <i>d</i> |
|------------------------|----------|-----------|----------|-----------|----------------|----------|------------------|
|                        | <i>M</i> | <i>SD</i> | <i>M</i> | <i>SD</i> |                |          |                  |
| Agentic Goals          | -1.01    | 1.27      | -.96     | 1.22      | -.38           | .35      | 1.25             |
| Communal Goals         | 2.08     | 1.62      | 1.79     | 1.76      | 1.59           | .06      | 1.68             |
| Rule-Breaking Behavior | 1.25     | .22       | 1.31     | .28       | -2.11          | .02      | 0.25             |
| Aggressive Behavior    | 1.39     | .25       | 1.37     | .29       | .87            | .19      | 0.27             |
| Prosocial Behavior     | 2.76     | .27       | 2.55     | .40       | 5.85           | < .001   | 0.33             |

**Table E4**

Beta Coefficients and Standard Errors for Direct Paths in Model.

|                           |                          | $\beta$ | <b>B</b> | <b>S.E.</b> |
|---------------------------|--------------------------|---------|----------|-------------|
| Parental Warmth           | → Agentic Goals          | -.31    | -.91     | .38         |
| Parental Warmth           | → Communal Goals         | .01     | .02      | .52         |
| Parental Coercion         | → Agentic Goals          | .03     | .09      | .26         |
| Parental Coercion         | → Communal Goals         | -.26    | -1.00    | .35         |
| Parental Autonomy Support | → Agentic Goals          | .09     | .28      | .42         |
| Parental Autonomy Support | → Communal Goals         | .10     | .41      | .58         |
| Agentic Goals             | → Rule-Breaking Behavior | .18     | .04      | .01         |
| Agentic Goals             | → Aggressive Behavior    | .28     | .06      | .01         |
| Agentic Goals             | → Prosocial Behavior     | -.13    | -.04     | .01         |
| Communal Goals            | → Rule-Breaking Behavior | -.05    | -.01     | .01         |
| Communal Goals            | → Aggressive Behavior    | -.12    | -.02     | .01         |
| Communal Goals            | → Prosocial Behavior     | .22     | .05      | .01         |
| Age                       | → Agentic Goals          | .21     | .14      | .04         |
| Age                       | → Communal Goals         | .11     | .11      | .05         |
| Age                       | → Rule-Breaking Behavior | .26     | .04      | .01         |
| Age                       | → Aggressive Behavior    | .04     | .01      | .01         |
| Gender                    | → Rule-Breaking Behavior | .15     | .07      | .02         |
| Gender                    | → Prosocial Behavior     | -.29    | -.21     | .03         |
